# Supplementary material
Source: PubMed Central journal article supplement (PMC2778392)
Supplement: mcp244_1.pdf [file mcp244_1.pdf]

## SUPPLEMENTARY DATA

TABLE S1. Polygalacturonase amino acid sequences used in the molecular phylogenetic analysis.

| Abbreviation                 | Species (gene name, expression)                        | SwissProt No. | GenBank No. |
|------------------------------|--------------------------------------------------------|---------------|-------------|
| BcMF9                        | <i>Brassica campestris</i>                             | —             | EF101564    |
| BcMF2                        | <i>Brassica campestris</i>                             | —             | EU181170    |
| BcMF6                        | <i>Brassica campestris</i>                             | —             | FJ873389    |
| <b>Endopolygalacturonase</b> |                                                        |               |             |
| Actde.pg                     | <i>Actinidia deliciosa</i> (leaf & bud)                | P35336        | L12019      |
| Actde2.pg                    | <i>Actinidia deliciosa</i> (fruit)                     | —             | AAF71160    |
| Arath11.pg                   | <i>Arabidopsis thaliana</i> (root & seedling)          | Q38958        | X98130      |
| Arath12.pg                   | <i>Arabidopsis thaliana</i>                            | O22699        | AC002292    |
| Brana1.pg                    | <i>Brassica napus</i> (PG35-8) (pod dehiscence)        | Q42399        | X95800      |
| Brana2.pg                    | <i>Brassica napus</i> (SAC66) (pod development)        | Q42636        | Z49971      |
| Brana3.pg                    | <i>Brassica napus</i> (PGAZ) (leaf abscission)         | —             | AJ250919    |
| Cucme1.pg                    | <i>Cucumis melo</i> (fruit ripening)                   | O81244        | AF062465    |
| Cucme2.pg                    | <i>Cucumis melo</i> (MPG 2) (fruit ripening)           | O81245        | AF062466    |
| Cucme3.pg                    | <i>Cucumis melo</i> (fruit ripening)                   | O81246        | AF062467    |
| Cucsa.pg                     | <i>Cucumis sativus</i> (stress induced)                | —             | AB035890    |
| Glyma1.pg                    | <i>Glycine max</i> (roots, wound response)             | Q9SWS3        | AF128266    |
| LycesA.pg                    | <i>Lycopersicon esculentum</i> (PG2A, fruit)           | P05117        | X04583      |
| Lyces1.pg                    | <i>Lycopersicon esculentum</i> (TAPG1) (stigma, style) | O22311        | AF001000    |
| Lyces2.pg                    | <i>Lycopersicon esculentum</i> (TAPG2) (stigma, style) | Q96487        | AF001001    |
| Lyces3.pg                    | <i>Lycopersicon esculentum</i> (TAPG3) (abscission)    | O22310        | AF000999    |
| Lyces4.pg                    | <i>Lycopersicon esculentum</i> (TAPG4) (stigma, style) | Q96488        | U70481      |
| Lyces5.pg                    | <i>Lycopersicon esculentum</i> (TAPG5) (abscission)    | O22313        | AF001003    |
| Lyces6.pg                    | <i>Lycopersicon esculentum</i> (TAPG6)                 | O22610        | AF029230    |
| Lyces7.pg                    | <i>Lycopersicon esculentum</i> (stigma, style)         | —             | AF072732    |
| Lyces8.pg                    | <i>Lycopersicon esculentum</i> (wound response)        | —             | AF118567    |
| Lyces9.pg                    | <i>Lycopersicon esculentum</i> (seed)                  | —             | AF138858    |
| Maldo.pg                     | <i>Malus domestica</i> (fruit)                         | P48978        | L27743      |
| Orysa.pg                     | <i>Oryza sativa</i>                                    | —             | AP003140    |
| Peram.pg                     | <i>Persea americana</i> (fruit)                        | Q02096        | X66426      |

|           |                                       |        |          |
|-----------|---------------------------------------|--------|----------|
| Pissa.pg  | <i>Pisum sativum</i>                  | —      | AF361321 |
| Prupe1.pg | <i>Prunus persica</i> (PRF5)(fruit)   | P48979 | X76735   |
| Prupe3.pg | <i>Prunus persica</i>                 | Q43063 | X77231   |
| Rubid.pg  | <i>Rubus idaeus</i> (fruit)           | O65886 | AJ224147 |
| TsPG      | <i>Turnera subulata</i> (short style) | —      | AY185765 |
| Vitvi.pg  | <i>Vitis vinifera</i> (fruit)         | —      | AY043233 |

#### **Exopolygalacturonase**

|            |                                             |        |        |
|------------|---------------------------------------------|--------|--------|
| Arath1.epg | <i>Arabidopsis thaliana</i> (flower)        | P49063 | X72292 |
| Arath2.epg | <i>Arabidopsis thaliana</i> (PGA2) (flower) | O65401 | X73222 |

#### **Pollen polygalacturonase**

|            |                                             |        |           |
|------------|---------------------------------------------|--------|-----------|
| Goshi.pp   | <i>Gossypium hirsutum</i> (G9) (pollen)     | Q39786 | U09717    |
| Medsa.pp   | <i>Medicago sativa</i> (P73)(pollen)        | Q40312 | U20431    |
| Nicta.pp   | <i>Nicotiana tabacum</i> (Npg1) (pollen)    | Q05967 | X71020    |
| Nicta2.pp  | <i>Nicotiana tabacum</i> (sperm cell)       | —      | AF248538  |
| Salgi2.pp  | <i>Salix gilgiana</i> (male flower)         | Q9MBB9 | AB029458  |
| TsPP       | <i>Turnera subulata</i> (pollen)            | —      | AY185764  |
| Brana.pep  | <i>Brassica napus</i> (Sta 44-4)(pollen)    | P35337 | L19879    |
| Oenor.pep  | <i>Oenothera organensis</i> (pollen)        | P24548 | —         |
| Phlpr.pep  | <i>Phleum pratense</i> (pollen)             | Q9XG86 | AJ238848  |
| Zeama1.pep | <i>Zea mays</i> (pollen)                    | P26216 | X57627    |
| Braol.pp   | <i>Brassica oleracea</i> (PG1) (pollen)     | —      | AF518563  |
| Arath1.pp  | <i>Arabidopsis thaliana</i> (PGA3) (pollen) | —      | AY096534  |
| Arath2.pp  | <i>Arabidopsis thaliana</i> (PGA4) (pollen) | —      | NM_100158 |

---

Abbreviations for the individual enzyme specificities follow Markovič and Janeček (2001) as follows: pg, endopolygalacturonase; epg, exopolygalacturonase; pp, pollen polygalacturonase; pep, pollen exopolygalacturonase.
